# Supplementary material
Source: publisher figshare collection journal article supplement (https://frontiersin.figshare.com/ndownloader/files/34119609)
Supplement: Supplementary file [file 34119609]

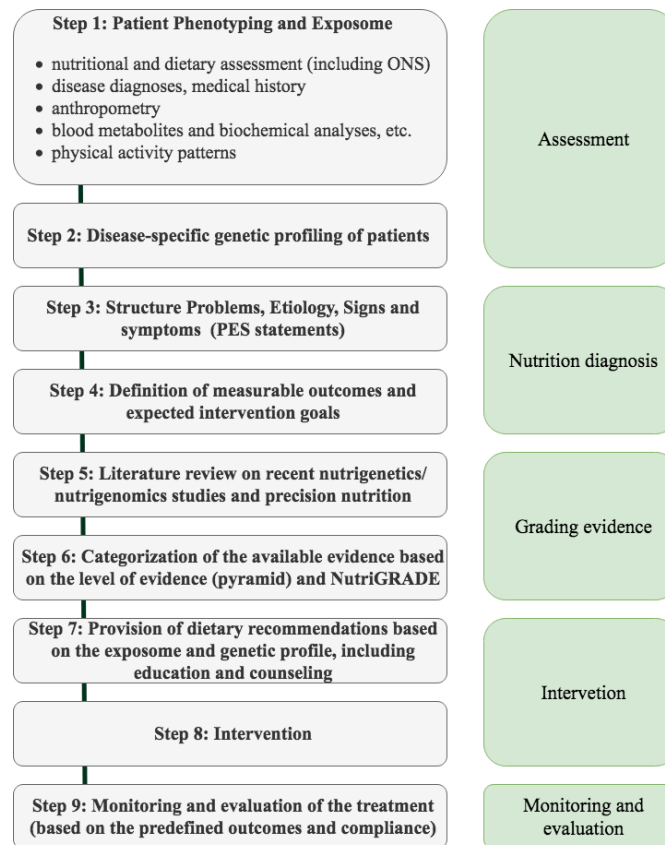

**Supplementary Figure 2.** Proposed roadmap for the implementation of precision nutrition interventions based on nutrigenetics and nutrigenomics data and the NCP model. *NCP: Nutrition care process; ONS: oral nutrient supplementation.*
